# Supplementary material
Source: PubMed Central journal article supplement (PMC2933648)

# Cyclic Alternating ROMP (CAROMP). Rapid Access to Functionalized Cyclic Polymers

Airong Song, Kathlyn A. Parker,\* Nicole, S. Sampson\*

Department of Chemistry, Stony Brook University, Stony Brook, New York 11794-3400

\*corresponding authors: kathlyn.parker@stonybrook.edu; nicole.sampson@stonybrook.edu

## Table of Contents

|                                                                                                                                                                                |       |           |
|--------------------------------------------------------------------------------------------------------------------------------------------------------------------------------|-------|-----------|
| <b>Materials and Methods</b>                                                                                                                                                   | ----- | <b>2</b>  |
| <b>References</b>                                                                                                                                                              | ----- | <b>4</b>  |
| <b>Table S1:</b> CAROMP of 1-substituted cyclobutene esters with cyclohexenes using Hoveyda-Grubbs II catalyst                                                                 | ---   | <b>5</b>  |
| <b>Figure S1:</b> <sup>1</sup> H-NMR spectrum of <b>cyclic (1a-2-D<sub>10</sub>)<sub>n</sub>1a + cyclic (1a-2-D<sub>10</sub>)<sub>n</sub></b> from Hoveyda Grubbs II catalysis | ----  | <b>6</b>  |
| <b>Figure S2:</b> <sup>1</sup> H-NMR spectrum of <b>cyclic (1a-2-D<sub>10</sub>)<sub>n</sub>1a + cyclic (1a-2-D<sub>10</sub>)<sub>n</sub></b> from Grubbs III catalysis        | ----- | <b>7</b>  |
| <b>Figure S3:</b> <sup>1</sup> H-NMR Spectrum of <b>Cyclic (1b-2-D<sub>10</sub>)<sub>n</sub>1b + cyclic (1b-2-D<sub>10</sub>)<sub>n</sub></b> from Hoveyda Grubbs II catalysis | ---   | <b>8</b>  |
| <b>Figure S4:</b> <sup>1</sup> H-NMR Spectrum of <b>Cyclic (1NMe<sub>3</sub>-2)<sub>n</sub>1NMe<sub>3</sub> + cyclic (1NMe<sub>3</sub>-2)<sub>n</sub></b>                      | ----- | <b>9</b>  |
| <sup>1</sup> H-NMR spectrum of <b>1b</b>                                                                                                                                       | ----- | <b>10</b> |
| <sup>13</sup> C-NMR spectrum of <b>1b</b>                                                                                                                                      | ----- | <b>11</b> |

**Materials and General Procedures.** Coupling agents used were purchased from Advanced Chem Tech. (Louisville, KY) or PerSeptive Biosystems (Framingham, MA). Solvents, chemical reagents, cyclohexene **2**, and catalysts were obtained from Fisher Scientific, Inc. (Springfield, NJ) or Sigma-Aldrich (Milwaukee, WI). Cyclohexene-D<sub>10</sub>, **2-D**<sub>10</sub>, was purchased from CDN Isotope Inc. (Cat #: D0173). (H<sub>2</sub>IMes)(3-Brpyr)<sub>2</sub>Cl<sub>2</sub>Ru=CHPh **3**<sup>1</sup> 1-cyclobutenecarboxylic acid and **1a**<sup>2,3</sup> were prepared according to the literature. CH<sub>2</sub>Cl<sub>2</sub>, benzene, Et<sub>2</sub>O, THF and CH<sub>3</sub>OH were dried in a GlassContour solvent pushstill system; pentane was used without further purification. All reactions were carried out under an Ar atmosphere in oven-dried glassware unless otherwise specified. Analytical thin layer chromatography (TLC) was performed on precoated silica gel plates (60F254), flash chromatography on silica gel-60 (230–400 mesh) and Combi-Flash chromatography on RediSep normal phase silica columns (Teledyne Isco, silica gel-60, 230–400 mesh). TLC spots were detected by UV light and by staining with phosphomolybdic acid (PMA). Inova400, Inova500 and Inova600 MHz NMR Instruments were used to perform NMR analysis. <sup>1</sup>H-NMR spectra are reported as chemical shift in parts per million (multiplicity, coupling constant in Hz, integration) and were acquired in CDCl<sub>3</sub> unless otherwise noted. <sup>1</sup>H-NMR data are assumed to be first order. High resolution mass spectra were obtained on Thermo Fisher Scientific LTQ Orbitrap XL ETD. For PDI (Polydispersity Index) determination, polymers (before flash column chromatography purification) were dissolved in THF (0.5 mg/mL). An aliquot (100 μL) of the polymer solution was injected and analyzed by gel permeation chromatography using a Phenogel column (300 x 7.80 mm, 5 μm, linear mixed bed, 0-40k MW range). Elution was performed at 0.7 mL/min with THF and detection at 220 nm and 254 nm at 30 °C. Narrowly dispersed polystyrene standards from Aldrich were used as molecular weight calibrants. The number average and weighted average molecular weights were calculated from the chromatogram.

**1-Cyclobutenecarboxylic acid chloride.** 1-Cyclobutenecarboxylic acid (1.02 mmol, 100 mg) was dissolved in 1.5 mL dry CH<sub>2</sub>Cl<sub>2</sub>. The solution was cooled to 0 °C and oxalyl dichloride (4.08 mmol, 345 μL) was added. The temperature of the solution was raised to rt, and the mixture was allowed to react for 1 h. The solvent was evaporated to generate 1-cyclobutenecarboxylic acid chloride as a viscous oil that was used immediately without further purification.

**Cyclobutene ester, 1b.** 4-Chlorobutanol (1.36 mmol, 148 mg) and triethylamine (2.72 mmol, 379  $\mu$ L) were dissolved in 1.0 mL dry  $\text{CH}_2\text{Cl}_2$ , and the solution was stirred at 0  $^\circ\text{C}$  for 45 min before being added to a vial containing 1-cyclobutenecarboxylic acid chloride (1.02 mmol). The reaction mixture was stirred for 16 h at rt. The reaction mixture was diluted with  $\text{CH}_2\text{Cl}_2$ , washed three times with 5%  $\text{NaHCO}_3$ , followed by three washes with 1 N HCl and the  $\text{CH}_2\text{Cl}_2$  dried over  $\text{Na}_2\text{SO}_4$ . The  $\text{CH}_2\text{Cl}_2$  solution was concentrated by rotary evaporation, and then purified by flash column chromatography (60%  $\text{CH}_2\text{Cl}_2$ /pentane) to yield **1b** as a colorless oil (98 mg, 38%).  $^1\text{H-NMR}$  (500 MHz)  $\delta$  6.73 (s, 1H), 4.11 (t,  $J=6.0$  Hz, 2H), 3.54 (t,  $J=6.0$  Hz, 2H), 2.68 (t,  $J=6.0$  Hz, 2H), 2.43 (m, 2H), 1.81 (m, 4H).  $^{13}\text{C}$  NMR (100 MHz)  $\delta$  162.27, 146.69, 138.71, 63.31, 44.58, 29.31, 29.20, 27.20, 26.20. HRMS (ESI) calcd for  $\text{C}_9\text{H}_{14}\text{ClO}_2$   $[\text{M}+\text{H}]^+$  189.0677; found 189.0674.

**General Procedure for NMR AROMP Reactions.** An NMR tube was evacuated under high vacuum for 15 min, and then was purged with Ar for another 15 min. Under an Ar atmosphere, a solution of monomer **A** (1-cyclobutenecarboxylate ester) in  $\text{CD}_2\text{Cl}_2$  (300  $\mu$ L) was added to the NMR tube. Then a solution of ruthenium precatalyst in  $\text{CD}_2\text{Cl}_2$  (300  $\mu$ L) was added to the NMR tube. After complete mixing of the solution, the NMR tube was spun for 4-30 min at 25  $^\circ\text{C}$  in the NMR spectrometer (400, 500 or 600 MHz) until the precatalyst had reacted. Then monomer **B** (cyclohexene derivatives) in  $\text{CD}_2\text{Cl}_2$  (300  $\mu$ L) was added to the NMR tube. After all of monomer **A** was converted, the reaction was quenched with ethylvinyl ether (50  $\mu$ L) and was stirred for 1 h.

**Cyclic (1a-2-D<sub>10</sub>)<sub>n</sub> + cyclic (1a-2-D<sub>10</sub>)<sub>n</sub>1a.** Cyclobutene **1a** (0.12 mmol), cyclohexene **2-D<sub>10</sub>** (0.24 mmol) and **4** (0.006 mmol) were allowed to react for 9 h to reach 89% completion. The solvent was evaporated and the residue was purified by flash column chromatography (acetone: $\text{CH}_2\text{Cl}_2$ /3:97) to provide polymer **cyclic (1a-2-D<sub>10</sub>)<sub>n</sub> + cyclic (1a-2-D<sub>10</sub>)<sub>n</sub>1a** (11 mg, 44%).  $^1\text{H-NMR}$  (500 MHz,  $\text{CD}_2\text{Cl}_2$ )  $\delta$  6.79 (m, 2H), 5.40 (s, 18H), 3.71 (s, 60H), 2.34-2.07 (m, 80H).

**Cyclic (1b-2)<sub>n</sub> + cyclic (1b-2)<sub>n</sub>1b.** Cyclobutene **1b** (0.15 mmol), cyclohexene **2** (0.30 mmol) and **4** (0.006 mmol) were allowed to react for 5 h at rt to reach 90% completion. The solvent was evaporated, and the residue was purified by flash column chromatography (acetone: $\text{CH}_2\text{Cl}_2$ /5:95) to provide **cyclic (1b-2)<sub>n</sub> + cyclic (1b-2)<sub>n</sub>1b** (16 mg, 39%).  $^1\text{H}$  NMR (600 MHz)  $\delta$  6.75 (b, 25H), 5.39 (b, 30H), 4.16 (b, 50H), 3.57 (b, 50H), 2.48-1.98 (164H), 1.85 (b, 100H), 1.49-1.37 (b, 64H).  $M_n$  (PSS): 1327. *PDI*: 2.1.

**Cyclic (1NMe<sub>3</sub>-2)<sub>n</sub> + cyclic (1NMe<sub>3</sub>-2)<sub>n</sub>1NMe<sub>3</sub>. Cyclic (1b-2)<sub>n</sub> + cyclic (1b-2)<sub>n</sub>1b** and aqueous trimethylamine (45% wt, 1 mL) were mixed in acetonitrile (2 mL). The solution was heated to 70 °C for 4 h. The solvent was evaporated to provide **cyclic (1NMe<sub>3</sub>-2)<sub>n</sub> + cyclic (1NMe<sub>3</sub>-2)<sub>n</sub>1NMe<sub>3</sub>** as a brown powder. <sup>1</sup>H NMR (600 MHz, D<sub>2</sub>O) δ 6.89 (b, 25H), 5.42 (b, 30H), 4.28 (s, 50H), 3.42 (s, 50H), 3.19 (b, 225H), 2.42-1.26 (m, 328H).

## References

- (1) Love, J. A.; Morgan, J. P.; Trnka, T. M.; Grubbs, R. H., A practical and highly active ruthenium-based catalyst that effects the cross metathesis of acrylonitrile. *Angew. Chem. Int. Ed.* **2002**, 41, 4035-4037.
- (2) Lee, J. C.; Parker, K. A.; Sampson, N. S., Amino acid-bearing ROMP polymers with a stereoregular backbone. *J. Am. Chem. Soc.* **2006**, 128, 4578-4579.
- (3) Campbell, A.; Rydon, H. N., The synthesis of caryophyllenic acid. *J. Chem. Soc.* **1953**, 3002-3008.

**Table S1. CAROMP of 1-substituted cyclobutene esters with cyclohexenes using Hoveyda-Grubbs II catalyst, 4.<sup>a</sup>**

| <b>A</b>  | <b>B</b>                | [Ru] (M) | [A]:[B]:[Ru] | Rxn time (h) | Prod.                                                                                                                         | % conv <sup>b</sup> |
|-----------|-------------------------|----------|--------------|--------------|-------------------------------------------------------------------------------------------------------------------------------|---------------------|
| <b>1a</b> | <b>2-D<sub>10</sub></b> | 0.01     | 20:40:1      | 9            | <b>cyclic (1a-2-D<sub>10</sub>)<sub>n</sub> +</b>                                                                             | 89 <sup>c</sup>     |
| <b>1b</b> | <b>2</b>                | 0.01     | 25:50:1      | 4            | <b>cyclic (1a-2-D<sub>10</sub>)<sub>n</sub>1a</b><br><b>cyclic (1b-2)<sub>n</sub> +</b><br><b>cyclic (1b-2)<sub>n</sub>1b</b> | 92 <sup>d</sup>     |

<sup>a</sup>Both AROMP reactions were monitored by <sup>1</sup>H-NMR spectroscopy. <sup>b</sup>Percent conversion determined by integration of <sup>1</sup>H-NMR spectra. <sup>c</sup>Reaction was performed in CD<sub>2</sub>Cl<sub>2</sub> at rt. <sup>d</sup>Reaction was performed in CDCl<sub>3</sub> at 50 °C.

| Parameter                 | Value                                                                             |
|---------------------------|-----------------------------------------------------------------------------------|
| 1 Data File Name          | E:/ NMRdata/ 07262008-10012008/ 600/ CBCOOCH3-C6D10-Hoveyda20mer09092008.fid/ fid |
| 2 Title                   | CBCOOCH3-C6D10-Hoveyda20mer09092008                                               |
| 3 Origin                  | inov                                                                              |
| 4 Owner                   |                                                                                   |
| 5 Solvent                 | CD2Cl2                                                                            |
| 6 Pulse Sequence          | s2pul                                                                             |
| 7 Acquisition Date        | 2008-09-09T05:25:27                                                               |
| 8 Modification Date       |                                                                                   |
| 9 Temperature             | 25.0                                                                              |
| 10 Number of Scans        | 56                                                                                |
| 11 Spectrometer Frequency | 599.72                                                                            |
| 12 Spectral Width         | 8000.0                                                                            |
| 13 Lowest Frequency       | -1001.2                                                                           |
| 14 Nucleus                | <sup>1</sup> H                                                                    |
| 15 Acquired Size          | 15136                                                                             |
| 16 Spectral Size          | 32768                                                                             |

**Figure S1:** <sup>1</sup>H-NMR spectrum of **cyclic (1a-2D<sub>10</sub>)<sub>n</sub>1a + (1a-2D<sub>10</sub>)<sub>n</sub>** prepared from Hoveyda-Grubbs II catalysis

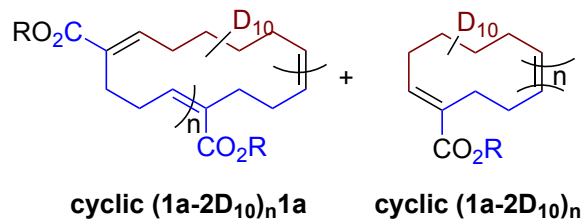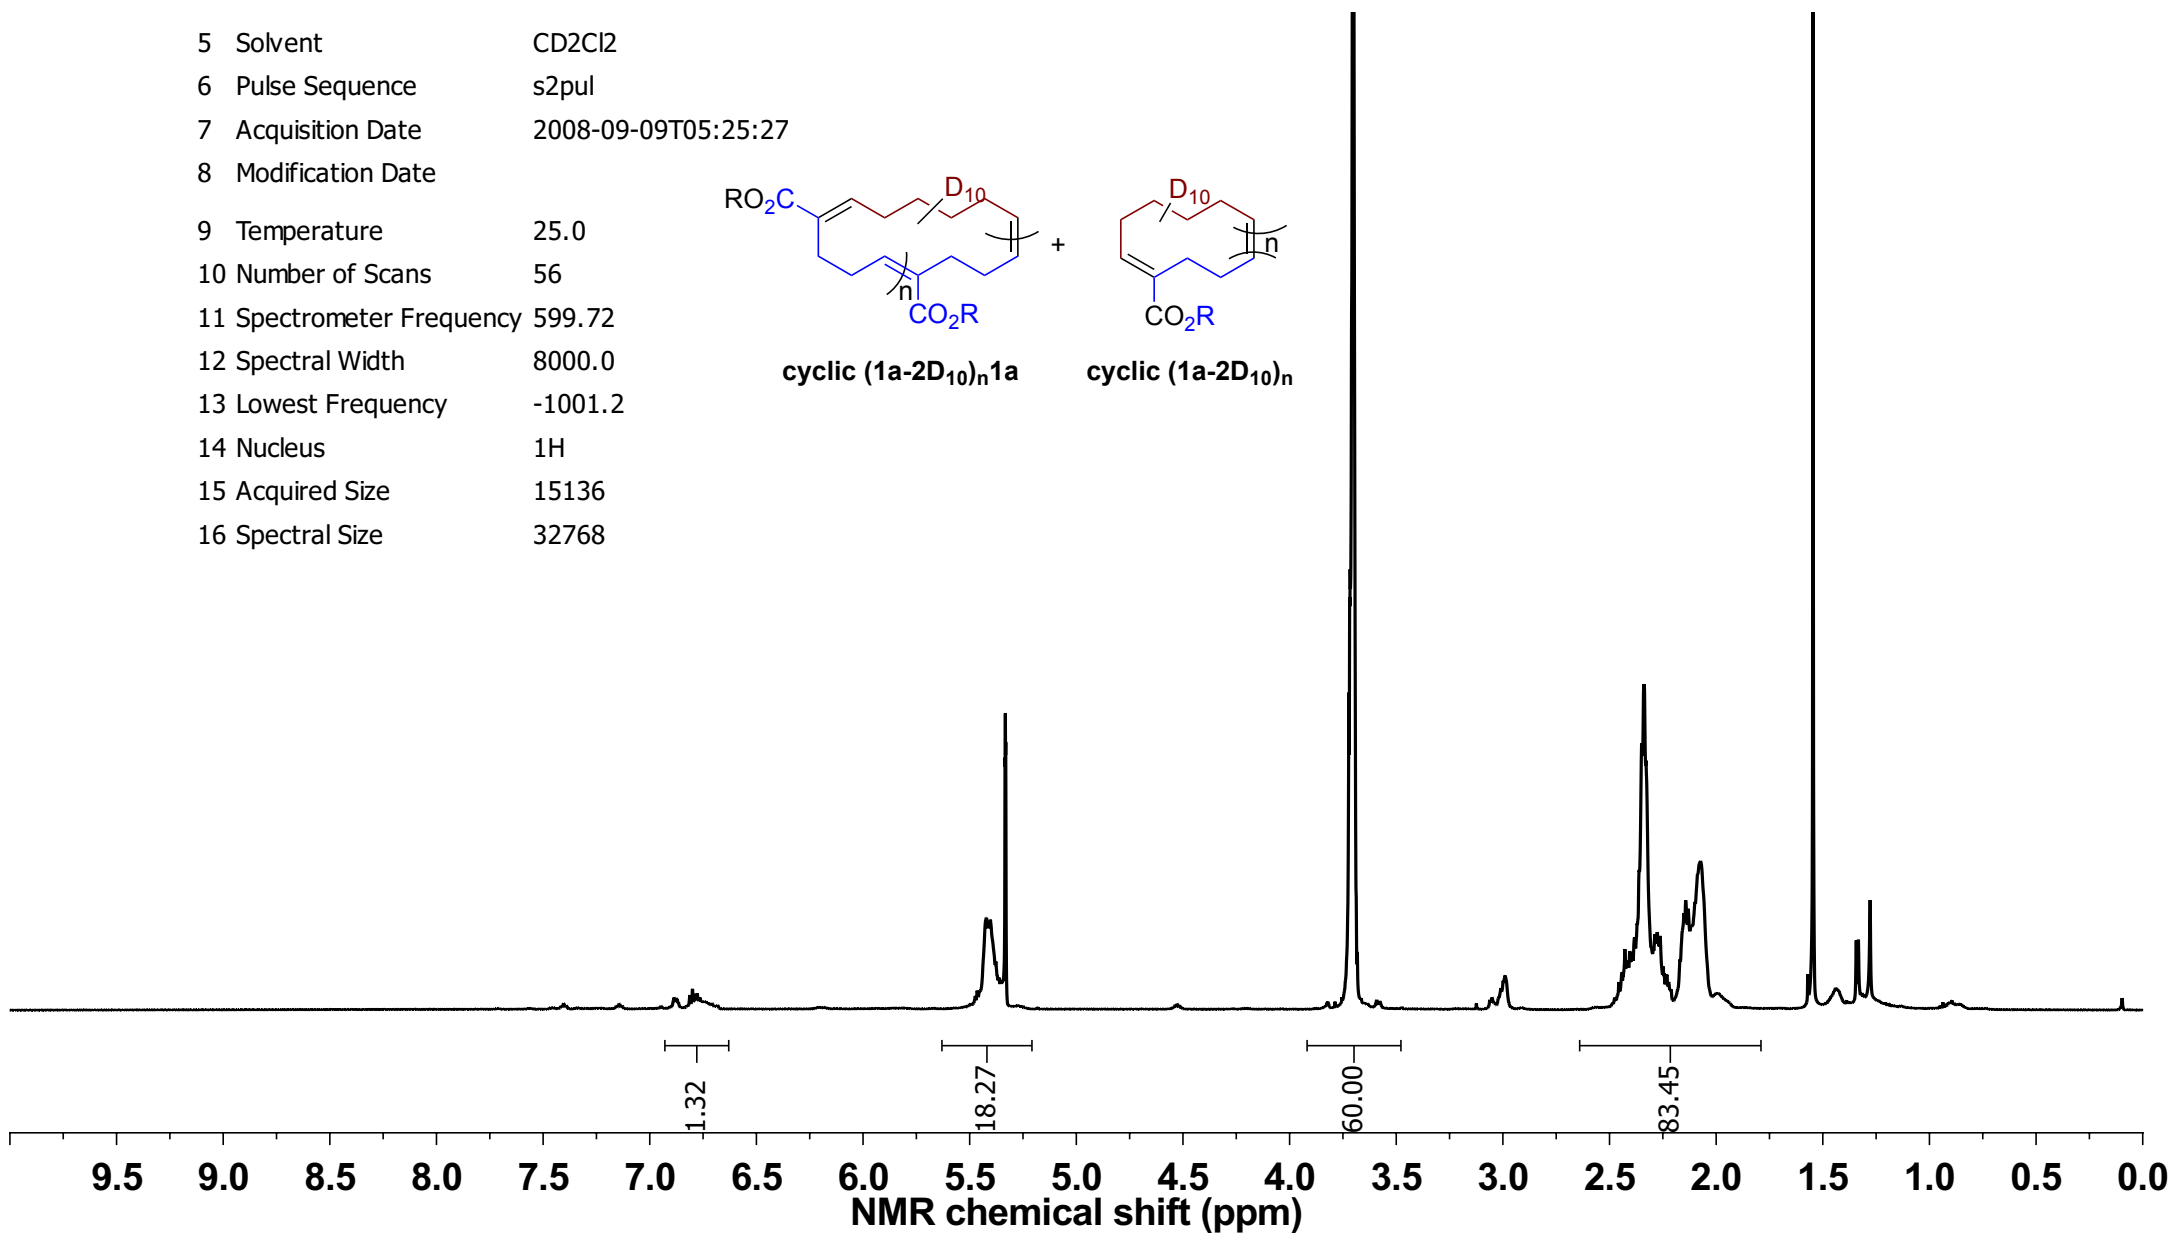

**Figure S2:**  $^1\text{H-NMR}$  spectrum of **linear/cyclic (1a-2-D10) $_n$ 1a + (1a-2-D10) $_n$**  prepared from Grubbs III catalysis

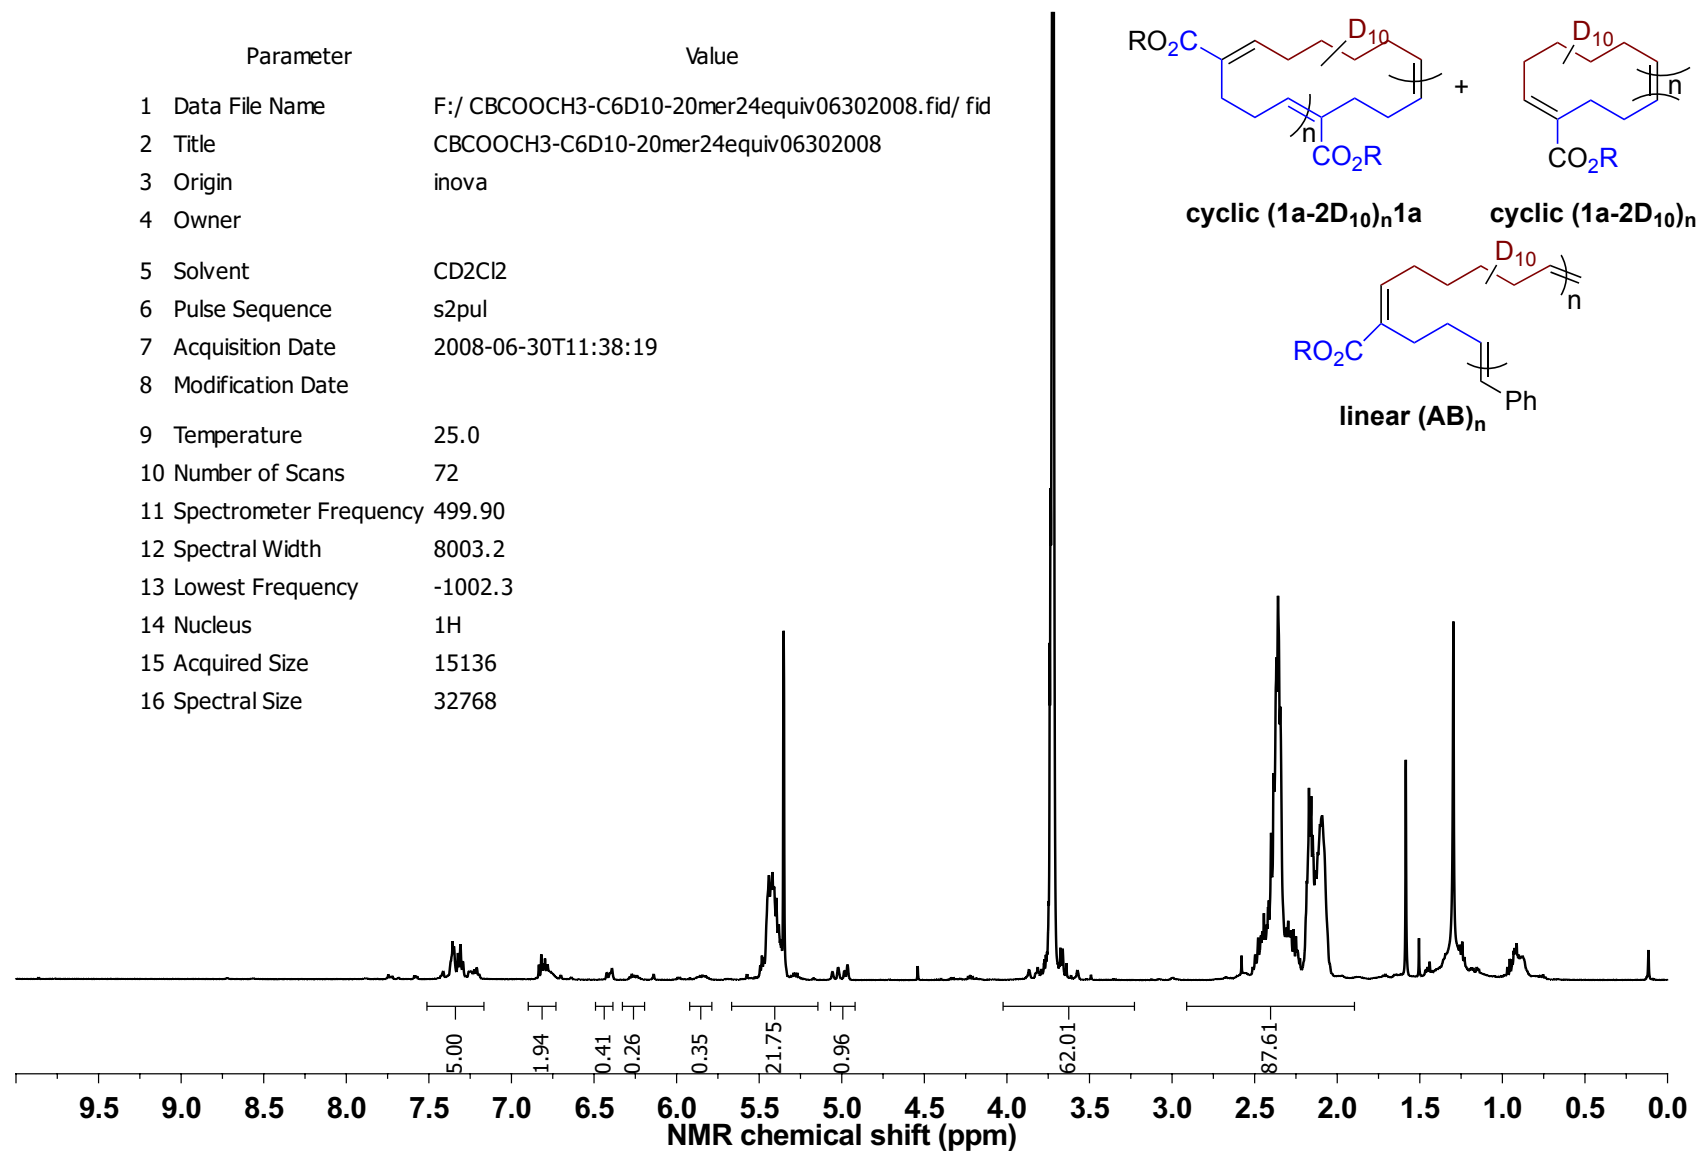

| Parameter                 | Value                                                            |
|---------------------------|------------------------------------------------------------------|
| 1 Data File Name          | E:/ NMRdata/ 02222010-02242010/ Intermediate-5-02222010.fid/ fid |
| 2 Title                   | Intermediate-5-02222010                                          |
| 3 Origin                  | Varian                                                           |
| 4 Spectrometer            | inova                                                            |
| 5 Author                  |                                                                  |
| 6 Solvent                 | CD2Cl2                                                           |
| 7 Temperature             | 25.0                                                             |
| 8 Pulse Sequence          | s2pul                                                            |
| 9 Number of Scans         | 96                                                               |
| 10 Receiver Gain          | 44                                                               |
| 11 Relaxation Delay       | 1.0000                                                           |
| 12 Pulse Width            | 0.0000                                                           |
| 13 Acquisition Time       | 1.8920                                                           |
| 14 Acquisition Date       | 2010-02-22T13:19:15                                              |
| 15 Modification Date      | 2010-02-22T10:25:48                                              |
| 16 Spectrometer Frequency | 599.72                                                           |
| 17 Lowest Frequency       | -1001.2                                                          |
| 18 Nucleus                | 1H                                                               |

**Figure S3:**  $^1\text{H-NMR}$  spectrum of **cyclic (1b-2) $_n$ 1b + (1b-2) $_n$**

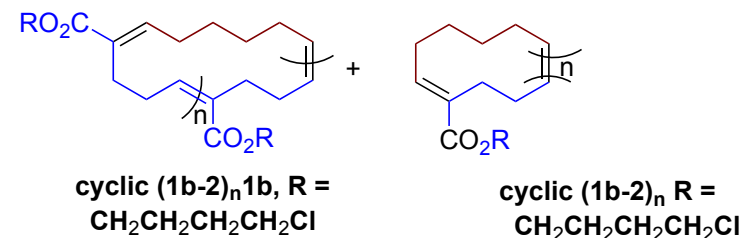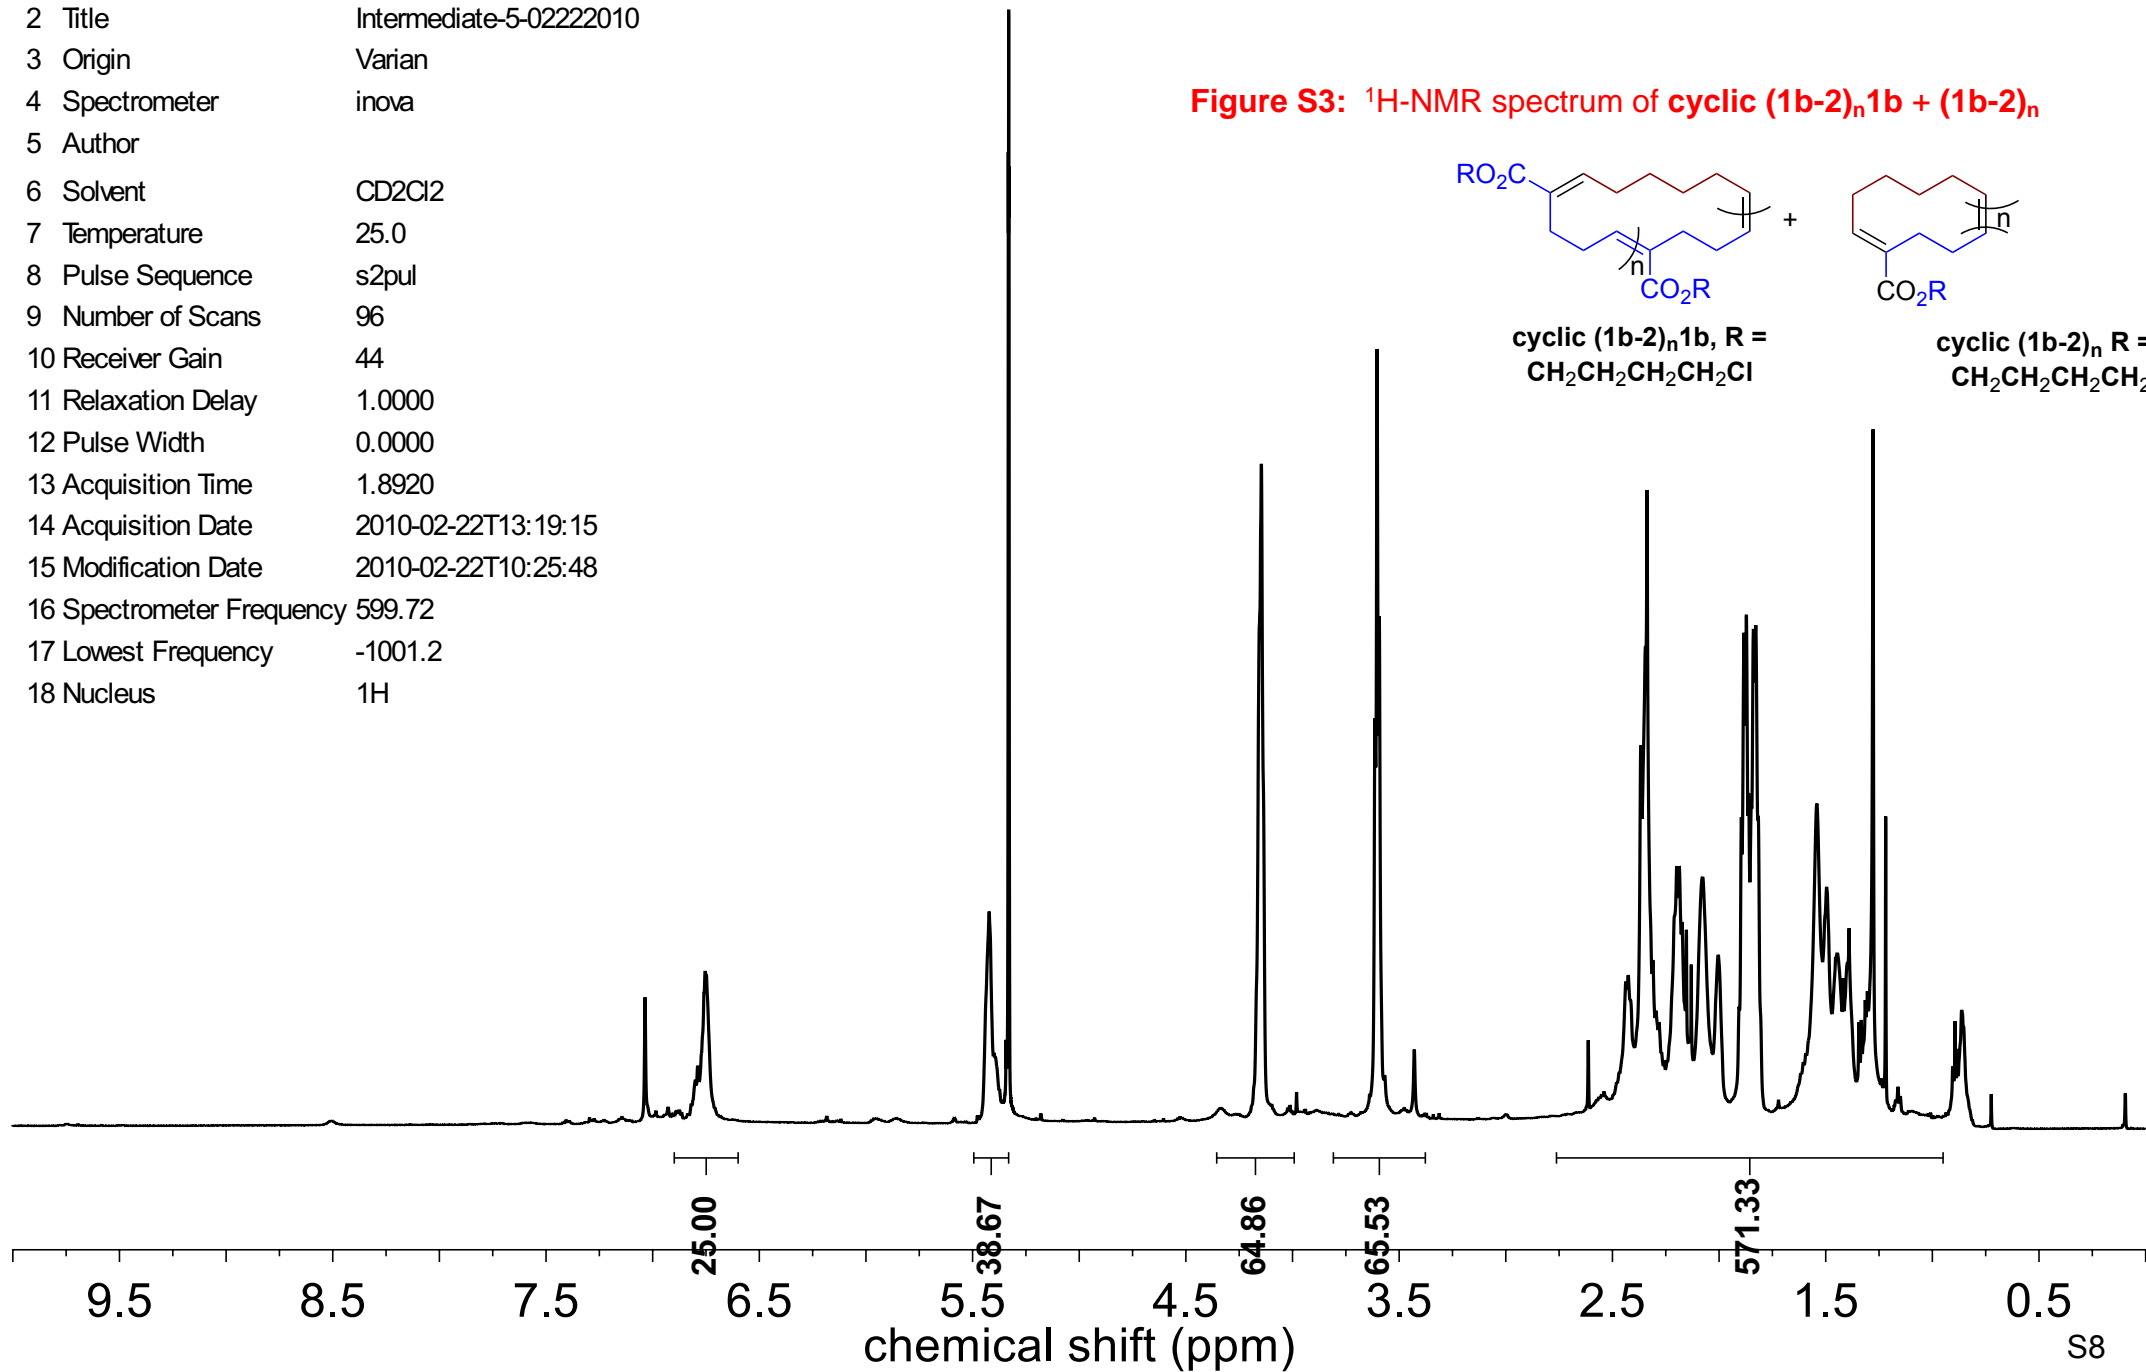



| Parameter                 | Value                                                       |
|---------------------------|-------------------------------------------------------------|
| 1 Data File Name          | E:/ NMRdata/ 02222010-02242010/ Polymer-5-02242010.fid/ fid |
| 2 Title                   | Polymer-5-02242010                                          |
| 3 Origin                  | Varian                                                      |
| 4 Spectrometer            | inova                                                       |
| 5 Author                  |                                                             |
| 6 Solvent                 | D2O                                                         |
| 7 Temperature             | 25.0                                                        |
| 8 Pulse Sequence          | s2pul                                                       |
| 9 Number of Scans         | 88                                                          |
| 10 Receiver Gain          | 38                                                          |
| 11 Relaxation Delay       | 1.0000                                                      |
| 12 Pulse Width            | 0.0000                                                      |
| 13 Acquisition Time       | 1.8920                                                      |
| 14 Acquisition Date       | 2010-02-24T10:02:57                                         |
| 15 Modification Date      | 2010-02-24T07:09:04                                         |
| 16 Spectrometer Frequency | 599.72                                                      |
| 17 Lowest Frequency       | -908.5                                                      |
| 18 Nucleus                | 1H                                                          |

**Figure S4:**  $^1\text{H-NMR}$  spectrum of cyclic  $(1\text{NMe}_3-2)_n1\text{NMe}_3 + (1\text{NMe}_3-2)_n$

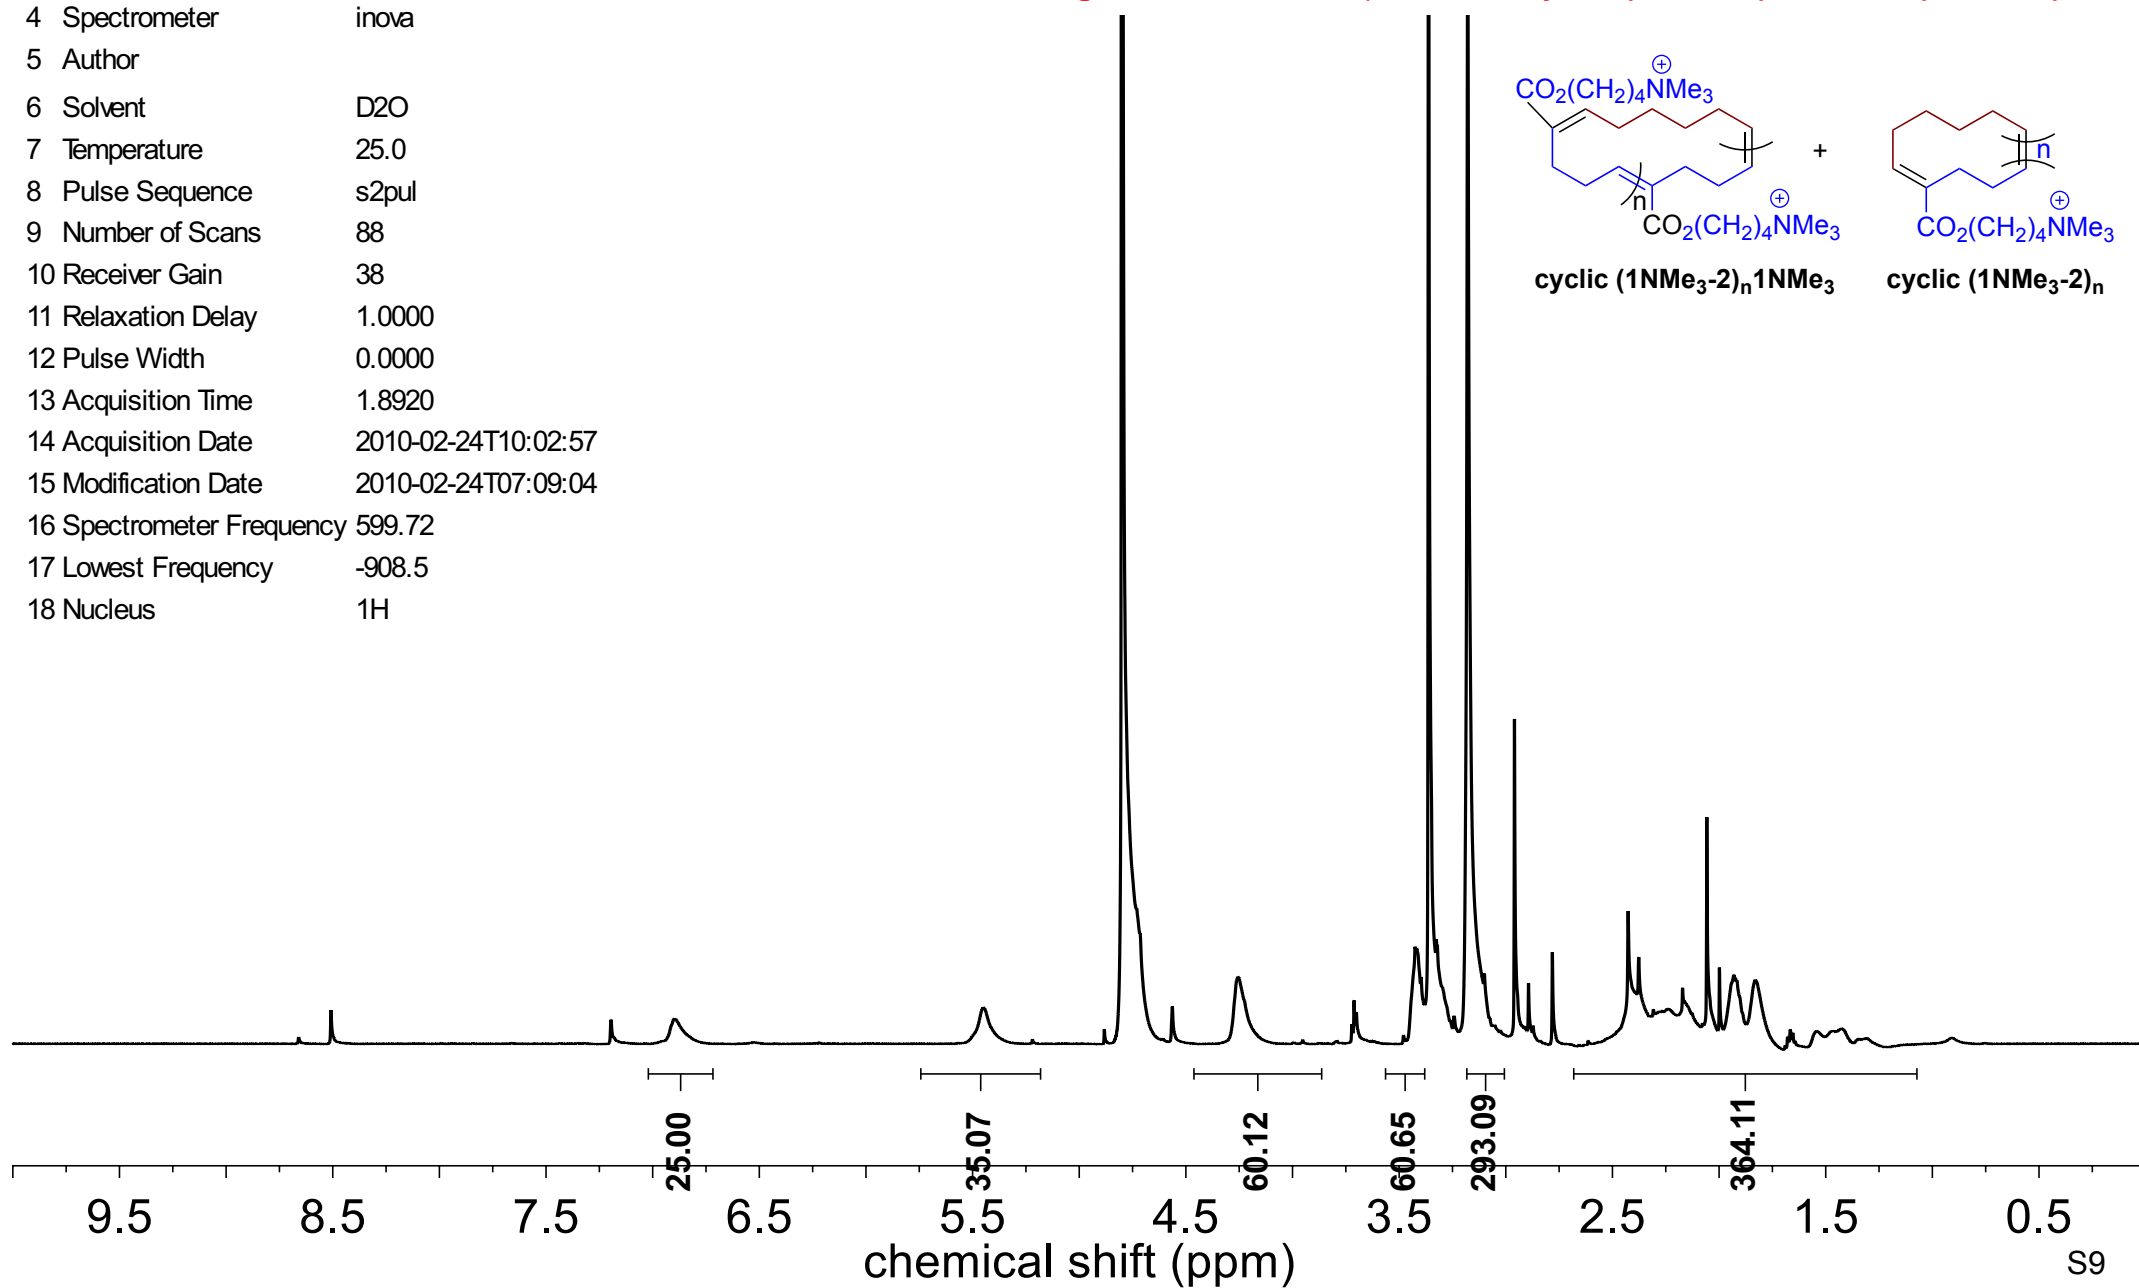

| Parameter                 | Value                                            |
|---------------------------|--------------------------------------------------|
| 1 Data File Name          | F:/revised/alterpoly/CBC00C 4H8C107292008fid/fid |
| 2 Title                   | CBC00C 4H9C107292008                             |
| 3 Origin                  | inova                                            |
| 4 Owner                   |                                                  |
| 5 Solvent                 | CDCB                                             |
| 6 Pulse Sequence          | s2pul                                            |
| 7 Acquisition Date        | 2008-08-29T12:12:38                              |
| 8 Modification Date       |                                                  |
| 9 Temperature             | 25.0                                             |
| 10 Number of Scans        | 16                                               |
| 11 Spectrometer Frequency | 500.72                                           |
| 12 Spectral Width         | 8000.0                                           |
| 13 Lowest Frequency       | -1001.3                                          |
| 14 Nucleus                | <sup>1</sup> H                                   |
| 15 Acquired Size          | 15136                                            |
| Spectral Size             | 32768                                            |

**<sup>1</sup>H-NMR spectrum of 1b**

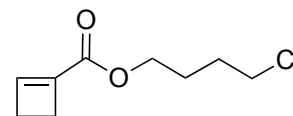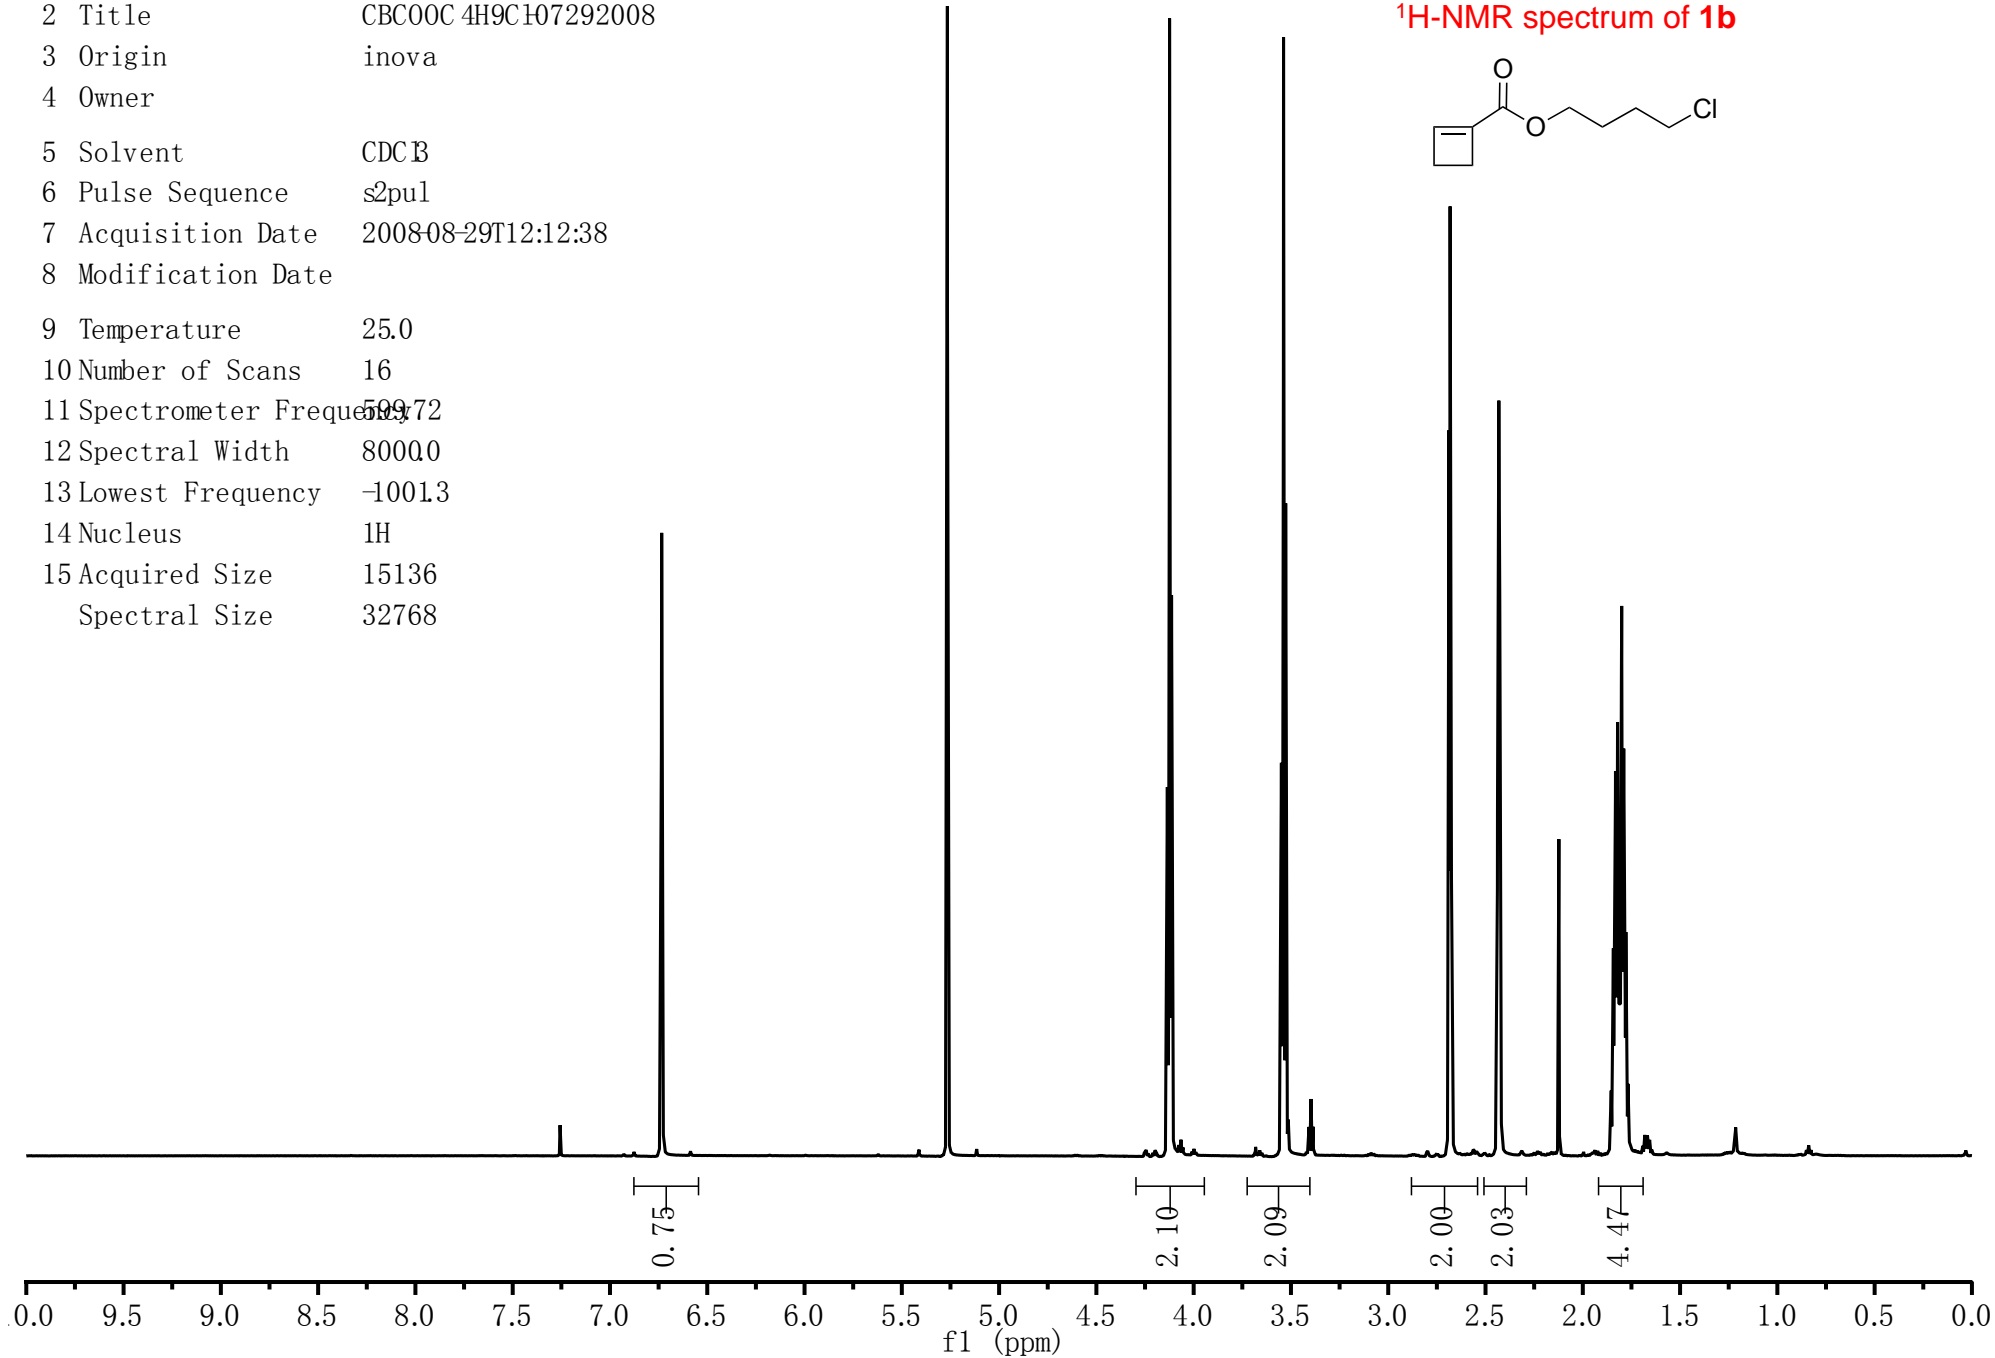

| Parameter                 | Value                                                         |
|---------------------------|---------------------------------------------------------------|
| 1 Data File Name          | F:/ revised-alter-poly/ CBC00C4H8Cl-C13NMR-07292008. fid/ fid |
| 2 Title                   | CBC00C4H8Cl-C13NMR-07292008                                   |
| 3 Origin                  | inova                                                         |
| 4 Owner                   |                                                               |
| 5 Solvent                 | CDC13                                                         |
| 6 Pulse Sequence          | s2pul                                                         |
| 7 Acquisition Date        | 2008-08-29T12:15:40                                           |
| 8 Modification Date       |                                                               |
| 9 Temperature             | 25.0                                                          |
| 10 Number of Scans        | 112                                                           |
| 11 Spectrometer Frequency | 100.55                                                        |
| 12 Spectral Width         | 25000.0                                                       |
| 13 Lowest Frequency       | -2991.4                                                       |
| 14 Nucleus                | 13C                                                           |
| 15 Acquired Size          | 29984                                                         |
| 16 Spectral Size          | 65536                                                         |

<sup>13</sup>C-NMR spectrum of **1b**

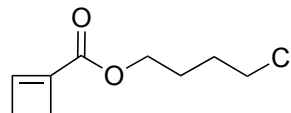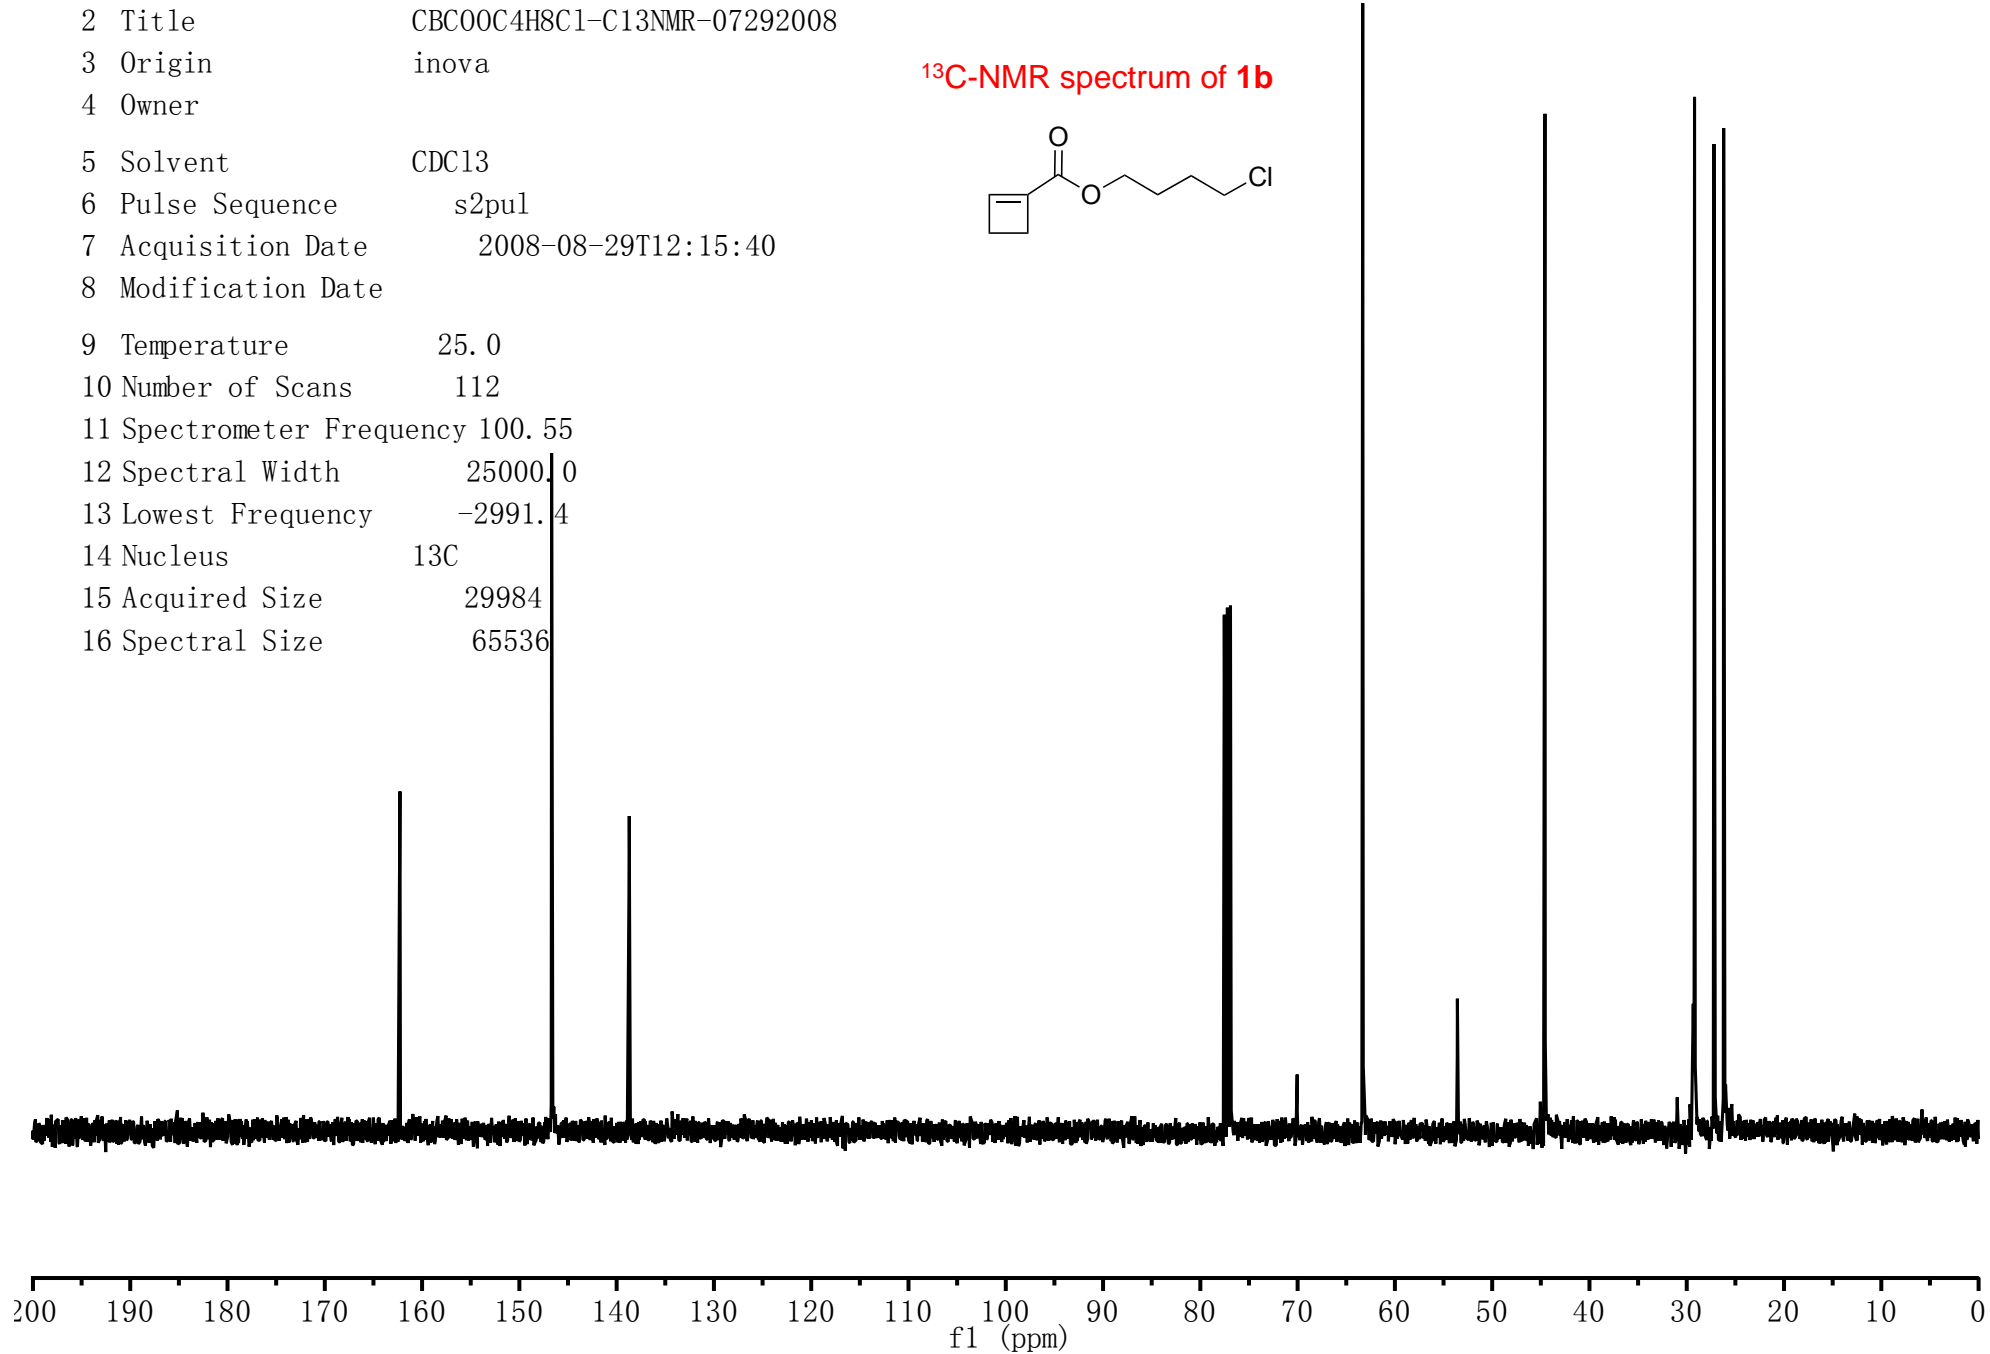

Supplement: NIHMS227006-supplement-1_si_001.pdf [file NIHMS227006-supplement-1_si_001.pdf]
